# Supplementary figures and images for: A Narrative Review of the History of Burn-Related Depression and Stress Reactions
Source: MDPI journal article supplement (doi:10.3390/medicina58101395), 2022-10-05

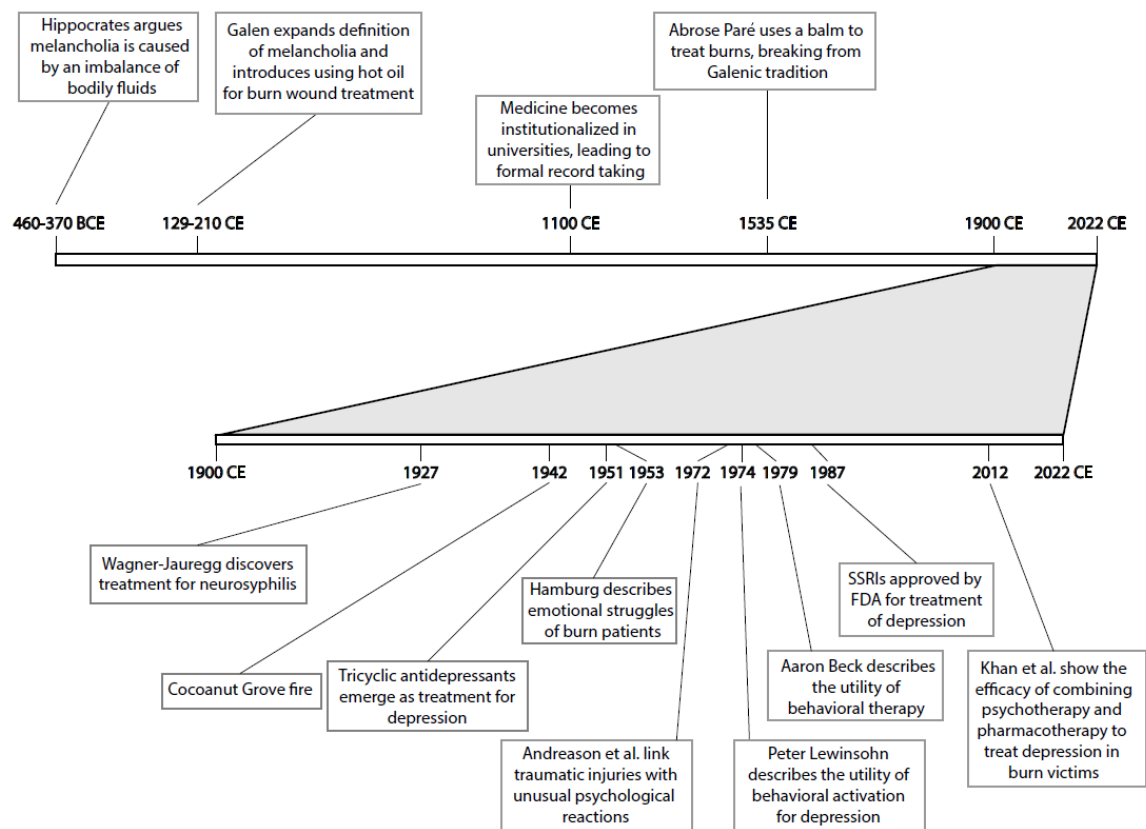

**Figure S1.** Milestones in the Management of Depression and Stress Reactions in Burn Care .

Supplement: s1 [file s1]
